# Supplementary material for: Cβ–H stretching vibration as a new probe for conformation of n-propanol in gaseous and liquid states
Source: Royal Society of Chemistry journal article supplement (doi:10.1039/c6cp00244g), 2016-01-01
Supplement: c6cp00244g1.pdf [file c6cp00244g1.pdf]

## Electronic Supplementary Information to:

### $C_{\beta}$ -H stretching vibration as a new probe for conformation of n-propanol in gaseous and liquid States

Yuanqin Yu,<sup>1</sup> Yuxi Wang,<sup>2</sup> Naiyin Hu,<sup>2</sup> Ke Lin,<sup>2</sup> Xiaoguo Zhou,<sup>2</sup> and Shilin Liu<sup>2,\*</sup>

<sup>1</sup> School of Physics and Material Science, Anhui University, Hefei, Anhui 230039, China

Hefei National Laboratory for Physical Sciences at the Microscale, iChEM (Collaborative Innovation Center of Chemistry for Energy Materials), Department of Chemical Physics, University of Science and Technology of China, Hefei 230026, China.

Corresponding author. E-mail: [sliu@ustc.edu.cn](mailto:sliu@ustc.edu.cn)

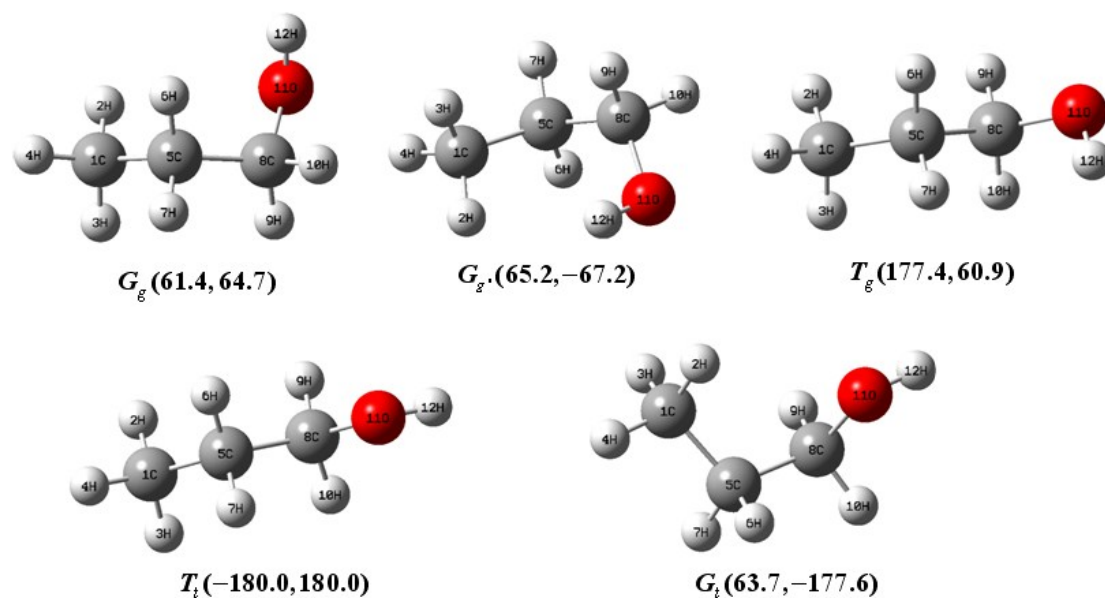

**Figure S1.** Geometry structures and labeling of atoms of n-propanol in the five conformers. The plane in n-propanol refers to C1-C5-C8-O11.

Table S1. The calculated vibrational frequencies ( $\text{cm}^{-1}$ ) and Raman activities and depolarization ratio ( $\rho$ ) as well as potential energy distribution (PED) analysis for five conformers of  $\text{CD}_3\text{CH}_2\text{CD}_2\text{OH}$  in the C-H bending ( $1400\text{-}1500\text{ cm}^{-1}$ ) and C-H stretching ( $2800\text{-}3100\text{ cm}^{-1}$ ) and OH stretching ( $3600\text{-}3700\text{ cm}^{-1}$ ) regions.

| Mode Description              | $G_g$                |                     |                                  | $T_g$                |                     |                                 | $G_g'$               |                     |                                 | $G_t$                |                     |                                 | $T_t$                |                     |                                   |
|-------------------------------|----------------------|---------------------|----------------------------------|----------------------|---------------------|---------------------------------|----------------------|---------------------|---------------------------------|----------------------|---------------------|---------------------------------|----------------------|---------------------|-----------------------------------|
|                               | $\nu_{\text{cal}}^a$ | Activity ( $\rho$ ) | PED(%) <sup>b</sup>              | $\nu_{\text{cal}}^a$ | Activity ( $\rho$ ) | PED(%) <sup>b</sup>             | $\nu_{\text{cal}}^a$ | Activity ( $\rho$ ) | PED(%) <sup>b</sup>             | $\nu_{\text{cal}}^a$ | Activity ( $\rho$ ) | PED(%) <sup>b</sup>             | $\nu_{\text{cal}}^a$ | Activity ( $\rho$ ) | PED(%) <sup>b</sup>               |
| $\beta\text{-CH}_2$ bending   | 1442.9               | 7.7                 | 95 $\delta$ (C5H <sub>2</sub> )  | 1456.6               | 7.5                 | 95 $\delta$ (C5H <sub>2</sub> ) | 1437.8               | 7.7                 | 95 $\delta$ (C5H <sub>2</sub> ) | 1439.4               | 7.8                 | 95 $\delta$ (C5H <sub>2</sub> ) | 1459.9               | 7.7                 | 95 $\delta$ (C5H <sub>2</sub> )   |
| $\beta\text{-CH}_2\text{-SS}$ | 2918.4               | 135.2<br>(0.08)     | 76 $\nu$ (C5H7)+ 23 $\nu$ (C5H6) | 2923.1               | 118.8<br>(0.10)     | 88 $\nu$ (C5H7)+12 $\nu$ (C5H6) | 2936.1               | 142.4<br>(0.08)     | 72 $\nu$ (C5H7)+28 $\nu$ (C5H6) | 2939.9               | 134.7<br>(0.07)     | 63 $\nu$ (C5H7)+36 $\nu$ (C5H6) | 2949.9               | 129.9<br>(0.06)     | 50 $\nu$ (C5H7)+ 50 $\nu$ (C5H6)  |
| $\beta\text{-CH}_2\text{-AS}$ | 2951.6               | 85.3<br>(0.59)      | 76 $\nu$ (C5H6)-24 $\nu$ (C5H7)  | 2972.3               | 80.1<br>(0.49)      | 87 $\nu$ (C5H6)-12 $\nu$ (C5H7) | 2974.1               | 77.8<br>(0.66)      | 71 $\nu$ (C5H6)-28 $\nu$ (C5H7) | 2973.1               | 75.3<br>(0.7)       | 63 $\nu$ (C5H6)-37 $\nu$ (C5H7) | 2983.4               | 72.3<br>(0.75)      | 50 $\nu$ (C5H6) - 50 $\nu$ (C5H7) |
| OH stretching                 | 3661.2               | 74.8<br>(0.21)      | 100 $\nu$ (OH)                   | 3663.1               | 75.9<br>(0.21)      | 100 $\nu$ (OH)                  | 3674.8               | 57.5<br>(0.18)      | 100 $\nu$ (OH)                  | 3681.3               | 112.6<br>(0.25)     | 100 $\nu$ (OH)                  | 3678.7               | 125.6<br>(0.26)     | 100 $\nu$ (OH)                    |

<sup>a</sup> Scale factors of 0.973 for C-H bending and stretching regions and of 0.956 for O-H stretching region. <sup>b</sup> potential energy terms higher than 5% are included.

The following symbols stand for:  $\nu$  - stretching;  $\delta$  -  $\text{CH}_2$  bending.

Table S2. The calculated vibrational frequencies ( $\text{cm}^{-1}$ ) and Raman activities as well as potential energy distribution (PED) analysis for five conformers of  $\text{CH}_3\text{CH}_2\text{CH}_2\text{OH}$  in the C-H bending ( $1400\text{-}1500\text{ cm}^{-1}$ ) and C-H stretching ( $2800\text{-}3100\text{cm}^{-1}$ ) and OH stretching ( $3600\text{-}3700\text{cm}^{-1}$ ) regions.

| Mode                                              | $G_g$                |                |                                                                                                       | $T_g$                |                |                                                                                                      | $G_g'$               |                |                                                                                                        | $G_t$                |                |                                                                                                     | $T_t$                |                |                                                                                                      |
|---------------------------------------------------|----------------------|----------------|-------------------------------------------------------------------------------------------------------|----------------------|----------------|------------------------------------------------------------------------------------------------------|----------------------|----------------|--------------------------------------------------------------------------------------------------------|----------------------|----------------|-----------------------------------------------------------------------------------------------------|----------------------|----------------|------------------------------------------------------------------------------------------------------|
|                                                   | $\nu_{\text{cal}}^a$ | Raman activity | PED(%) <sup>b</sup>                                                                                   | $\nu_{\text{cal}}^a$ | Raman activity | PED(%) <sup>b</sup>                                                                                  | $\nu_{\text{cal}}^a$ | Raman activity | PED(%) <sup>b</sup>                                                                                    | $\nu_{\text{cal}}^a$ | Raman activity | PED(%) <sup>b</sup>                                                                                 | $\nu_{\text{cal}}^a$ | Raman activity | PED(%) <sup>b</sup>                                                                                  |
| $\beta$ -CH <sub>2</sub> bending                  | 1441.6               | 0.6            | 86 $\delta$ (C5H <sub>2</sub> )                                                                       | 1449.6               | 18.6           | 70 $\delta$ (C5H <sub>2</sub> )+ 18 $\beta_3$ (C1H <sub>3</sub> )<br>+8 $\delta$ (C8H <sub>2</sub> ) | 1437.1               | 10.2           | 89 $\delta$ (C5H <sub>2</sub> )                                                                        | 1438.1               | 10.7           | 90 $\delta$ (C5H <sub>2</sub> )                                                                     | 1453.1               | 18.0           | 66 $\delta$ (C5H <sub>2</sub> )+26 $\beta_2$ (C1H <sub>3</sub> )                                     |
| out-of-plane<br>$\gamma$ -CH <sub>3</sub> bending | 1454.1               | 12.4           | 71 $\beta_2$ (C1H <sub>3</sub> )+17 $\delta$ (C8H <sub>2</sub> )                                      | 1460.8               | 7.2            | 89 $\beta_2$ (C1H <sub>3</sub> )                                                                     | 1470.3               | 2.2            | 52 $\beta_2$ (C1H <sub>3</sub> )-23 $\beta_3$ (C1H <sub>3</sub> ) -<br>16 $\delta$ (C8H <sub>2</sub> ) | 1454.5               | 11.0           | 78 $\beta_2$ (C1H <sub>3</sub> )+6 $\delta$ (C8H <sub>2</sub> )+<br>6 $\beta_3$ (C1H <sub>3</sub> ) | 1461.3               | 7.5            | 91 $\beta_2$ (C1H <sub>3</sub> )                                                                     |
| in-plane<br>$\gamma$ -CH <sub>3</sub> bending     | 1467.9               | 5.3            | 61 $\beta_3$ (C1H <sub>3</sub> )-22 $\delta$ (C8H <sub>2</sub> )                                      | 1462.7               | 0.3            | 52 $\beta_3$ (C1H <sub>3</sub> )-33 $\delta$ (C8H <sub>2</sub> )<br>-5 $\delta$ (C5H <sub>2</sub> )  | 1456.2               | 10.3           | 37 $\beta_2$ (C1H <sub>3</sub> )+28 $\delta$ (C8H <sub>2</sub> )<br>+25 $\beta_3$ (C1H <sub>3</sub> )  | 1468.4               | 4.0            | 77 $\beta_3$ (C1H <sub>3</sub> )-7 $\beta_2$ (C1H <sub>3</sub> )                                    | 1466.6               | 0.3            | 52 $\beta_3$ (C1H <sub>3</sub> )-19 $\delta$ (C5H <sub>2</sub> )<br>-19 $\delta$ (C8H <sub>2</sub> ) |
| $\alpha$ -CH <sub>2</sub><br>bending              | 1466.7               | 0.6            | 61 $\delta$ (C8H <sub>2</sub> )-16 $\beta_2$ (C1H <sub>3</sub> )+<br>14 $\beta_3$ (C1H <sub>3</sub> ) | 1475.4               | 3.2            | 57 $\delta$ (C8H <sub>2</sub> )-<br>22 $\delta$ (C5H <sub>2</sub> )+13 $\beta_3$ (C1H <sub>3</sub> ) | 1463.3               | 6.5            | 55 $\delta$ (C8H <sub>2</sub> ) -34 $\beta_3$ (C1H <sub>3</sub> )                                      | 1476.8               | 4.8            | 88 $\delta$ (C8H <sub>2</sub> )                                                                     | 1482.6               | 4.5            | 74 $\delta$ (C8H <sub>2</sub> )-13 $\delta$ (C5H <sub>2</sub> )<br>+5 $\beta_2$ (C1H <sub>3</sub> )  |
| $\alpha$ -CH <sub>2</sub> -SS                     | 2907.2               | 69.1           | 69 $\nu$ (C8H10)- 17 $\nu$ (C5H6)-<br>10 $\nu$ (C5H7)                                                 | 2898.2               | 115.8          | 95 $\nu$ (C8H10)                                                                                     | 2897.3               | 126.5          | 95 $\nu$ (C8H9)                                                                                        | 2891.2               | 130.5          | 70 $\nu$ (C8H9)+29 $\nu$ (C8H10)                                                                    | 2889.2               | 127.1          | 50 $\nu$ (C8H10)+49 $\nu$ (C8H9)                                                                     |
| $\alpha$ -CH <sub>2</sub> -AS                     | 2988.5               | 57.6           | 86 $\nu$ (C5C8) -5 $\nu$ (C8H10)                                                                      | 2989.7               | 30.2           | 66 $\nu$ (C8H9)+15 $\nu$ (C1H3)-<br>14 $\nu$ (C1H2)                                                  | 2999.2               | 91.0           | 80 $\nu$ (C8H10)+6 $\nu$ (C1H2) -<br>5 $\nu$ (C1H4)                                                    | 2920.2               | 103.9          | 59 $\nu$ (C8H10)-26 $\nu$ (C8H9)<br>-9 $\nu$ (C5H6)-5 $\nu$ (C5H7)                                  | 2914.9               | 105.3          | 48 $\nu$ (C8H9)-47 $\nu$ (C8H10)                                                                     |
| $\gamma$ -CH <sub>3</sub> -SS                     | 2943.4               | 121.1          | 47 $\nu$ (C1H3)+ 25 $\nu$ (C1H4)+<br>13 $\nu$ (C1H2)-11 $\nu$ (C5H7)                                  | 2940.6               | 163.8          | 41 $\nu$ (C1H3)+ 36 $\nu$ (C1H2)+<br>21 $\nu$ (C1H4)                                                 | 2935.8               | 40.7           | 35 $\nu$ (C1H3)-21 $\nu$ (C5H7)+<br>21 $\nu$ (C1H2)+16 $\nu$ (C1H4)+<br>-6 $\nu$ (C5H6)                | 2941.0               | 65.7           | 45 $\nu$ (C1H3)+25 $\nu$ (C1H4)-<br>15 $\nu$ (C5H7)+11 $\nu$ (C1H2)                                 | 2938.9               | 204.1          | 40 $\nu$ (C1H2)+39 $\nu$ (C1H3)<br>+18 $\nu$ (C1H4)                                                  |
| $\beta$ -CH <sub>2</sub> -SS                      | 2920.1               | 222.5          | 62 $\nu$ (C5H6)+22 $\nu$ (C8H10)<br>+9 $\nu$ (C5H7)+ 5 $\nu$ (C8H9)                                   | 2921.4               | 153.7          | 87 $\nu$ (C5H7)+ 10 $\nu$ (C5H6)                                                                     | 2934.2               | 254.8          | 49 $\nu$ (C5H7)+22 $\nu$ (C5H6)+<br>13 $\nu$ (C1H3)+13 $\nu$ (C1H2)                                    | 2942.2               | 249.2          | 44 $\nu$ (C5H7)+26 $\nu$ (C5H6)<br>+13 $\nu$ (C1H3)+9 $\nu$ (C8H10)                                 | 2948.8               | 80.9           | 48 $\nu$ (C5H7)+48 $\nu$ (C5H6)                                                                      |
| $\beta$ -CH <sub>2</sub> -AS                      | 2950.2               | 159.5          | 66 $\nu$ (C5H7)-<br>14 $\nu$ (C5H6)+ 8 $\nu$ (C1H2)                                                   | 2966.1               | 112.0          | 73 $\nu$ (C5H6)-10 $\nu$ (C8H9) -<br>6 $\nu$ (C5H7)                                                  | 2968.5               | 111.2          | 54 $\nu$ (C5H6)-20 $\nu$ (C5H7)-<br>14 $\nu$ (C1H2)+9 $\nu$ (C1H3)                                     | 2971.0               | 86.5           | 54 $\nu$ (C5H6)-32 $\nu$ (C5H7)<br>-6 $\nu$ (C5H7)-5 $\nu$ (C1H4)                                   | 2976.2               | 99.5           | 29 $\nu$ (C5H6)-29 $\nu$ (C5H7)<br>+19 $\nu$ (C1H3)-19 $\nu$ (C1H2)                                  |
| out-of-plane<br>$\gamma$ -CH <sub>3</sub> -AS     | 3001.4               | 66.8           | 48 $\nu$ (C1H4) -42 $\nu$ (C1H3)                                                                      | 3001.9               | 43.3           | 31 $\nu$ (C1H2)-<br>30 $\nu$ (C1H3)+18 $\nu$ (C8H9)                                                  | 3004.5               | 95.8           | 75 $\nu$ (C1H4)-12 $\nu$ (C1H3) -<br>5 $\nu$ (C5H6)                                                    | 3023.2               | 38.6           | 78 $\nu$ (C1H2)-14 $\nu$ (C1H4)                                                                     | 3001.1               | 5.38           | 31 $\nu$ (C1H2)-30 $\nu$ (C1H3)<br>-19 $\nu$ (C5H7)+19 $\nu$ (C5H6)                                  |

|                                           |        |      |                                                     |        |      |                                                     |        |      |                                                                                          |        |       |                                                    |        |       |                                                     |
|-------------------------------------------|--------|------|-----------------------------------------------------|--------|------|-----------------------------------------------------|--------|------|------------------------------------------------------------------------------------------|--------|-------|----------------------------------------------------|--------|-------|-----------------------------------------------------|
| in-plane<br>$\gamma$ -CH <sub>3</sub> -AS | 3018.3 | 41.4 | 74 $\nu$ (C1H2)-18 $\nu$ (C1H4) -<br>5 $\nu$ (C1H3) | 3008.0 | 80.7 | 77 $\nu$ (C1H4)-12 $\nu$ (C1H2)<br>+10 $\nu$ (C1H3) | 2994.6 | 14.5 | 40 $\nu$ (C1H2)-<br>31 $\nu$ (C1H3)+11 $\nu$ (C5H6)-<br>9 $\nu$ (C8H10)+ -8 $\nu$ (C5H7) | 2998.9 | 63.2  | 54 $\nu$ (C1H4)-36 $\nu$ (C1H3)<br>+8 $\nu$ (C5H6) | 3007.6 | 82.0  | 78 $\nu$ (C1H4)-10 $\nu$ (C1H3)<br>-10 $\nu$ (C1H2) |
| OH stretching                             | 3724.1 | 73.3 | 100 $\nu$ (O11H12)                                  | 3725.8 | 74.5 | 100 $\nu$ (O11H12)                                  | 3737.5 | 56.1 | 100 $\nu$ (OH)                                                                           | 3744.2 | 112.6 | 100 $\nu$ (OH)                                     | 3741.5 | 125.6 | 100 $\nu$ (O11H12)                                  |

<sup>a</sup> Scale factors of 0.973 for C-H bending and stretching regions and of 0.956 for O-H stretching region. <sup>b</sup> potential energy terms higher than 5% are included.

The following symbols stand for:  $\nu$  - stretching;  $\delta$  - CH<sub>2</sub> bending;  $\beta_1$  - CH<sub>3</sub> umbrella bending;  $\beta_2$  - CH<sub>3</sub> out-of-plane bending;  $\beta_3$  - CH<sub>3</sub> in-plane bending; the plane denotes the atoms of C1-C5-C8-O11 in CH<sub>3</sub>CH<sub>2</sub>CH<sub>2</sub>OH.

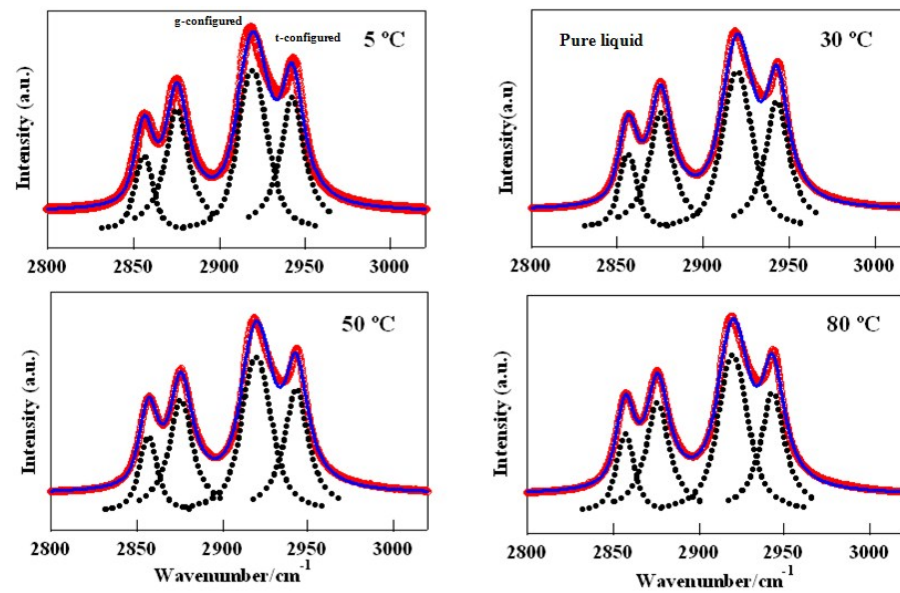

**Figure S2.** The temperature-dependent Raman spectra of liquid  $\text{CD}_3\text{CH}_2\text{CD}_2\text{OH}$  in pure liquid state fitted with four Voigt profiles.

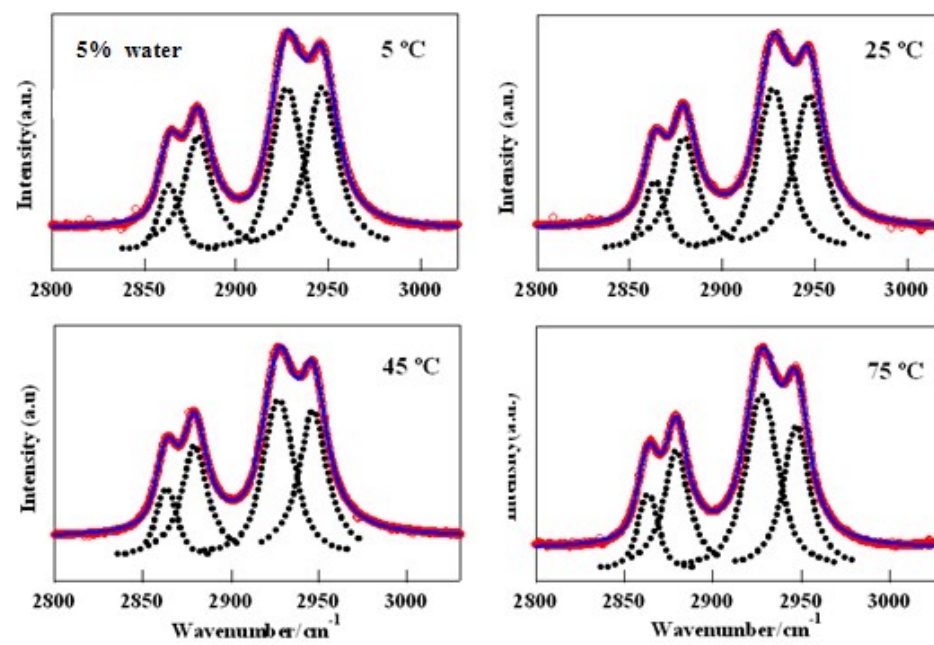

**Figure S3.** The temperature-dependent Raman spectra of liquid  $\text{CD}_3\text{CH}_2\text{CD}_2\text{OH}$  in 5% water solution fitted with four Voigt profiles.
